# Supplementary material
Source: Springer Nature journal article supplement (https://www.springermedizin.de/resource/supplementary/40164_2012_10_MOESM1_ESM.pdf/9687008)

FR 39Hz  
22cm

M3

2D  
63%  
C 50  
P Med  
HGen

PE

RV

RVM

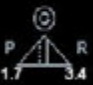

JPEG

112 bpm

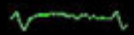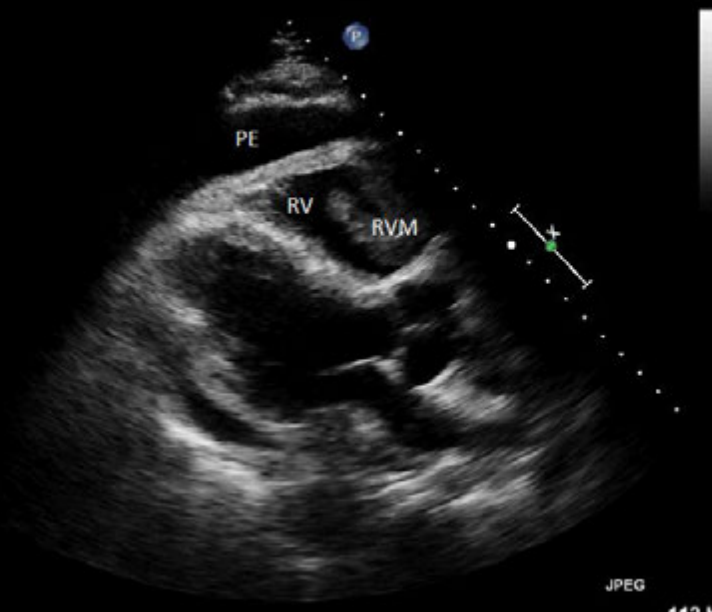

Supplement: MOESM1 [file 9687008]
